# Supplementary material
Source: Royal Society of Chemistry journal article supplement (doi:10.1039/d6cp01074a)
Supplement: d6cp01074a2.pdf [file d6cp01074a2.pdf]

## Supplementary Information

### Origin of adsorption trends in two-dimensional single-atom catalysts via d-state filling

Yuhao Qiu<sup>ab</sup>, Weiqi Song<sup>ab</sup>, Huimin Hu<sup>\*ab</sup>, and Jin-Ho Choi<sup>\*ab</sup>

<sup>a</sup> College of Energy, Soochow Institute for Energy and Materials InnovationS,

Soochow University, Suzhou 215006, China

<sup>b</sup> Key Laboratory of Advanced Carbon Materials and Wearable Energy Technologies

of Jiangsu Province, Soochow University, Suzhou 215006, China

**Table S1** Adsorption energies of atomic intermediates (H, C, N, O, Si, P, and S) on transition-metal dopants in N-doped graphene.

| Dopant            | H (k = 1) | C (k = 2) | N (k = 3) | O (k = 4) | Si (k = 2) | P (k = 3) | S (k = 4) |
|-------------------|-----------|-----------|-----------|-----------|------------|-----------|-----------|
| Sc ( $v_m = 3$ )  | -3.074    | -3.469    | -4.202    | -5.592    | -2.254     | -2.398    | -3.155    |
| Ti ( $v_m = 4$ )  | -3.248    | -4.216    | -6.187    | -8.184    | -2.745     | -3.328    | -4.999    |
| V ( $v_m = 5$ )   | -2.897    | -4.824    | -7.388    | -8.028    | -2.729     | -3.725    | -4.787    |
| Cr ( $v_m = 6$ )  | -2.487    | -4.662    | -6.959    | -6.317    | -2.588     | -3.370    | -3.247    |
| Mn ( $v_m = 7$ )  | -2.396    | -5.309    | -6.522    | -5.197    | -2.994     | -3.017    | -2.610    |
| Fe ( $v_m = 8$ )  | -2.535    | -5.608    | -5.164    | -4.784    | -3.497     | -2.690    | -2.722    |
| Co ( $v_m = 9$ )  | -2.599    | -3.729    | -3.918    | -3.394    | -2.624     | -2.163    | -1.823    |
| Ni ( $v_m = 10$ ) | -1.128    | -1.735    | -2.326    | -1.932    | -1.181     | -0.736    | -0.497    |
| Y ( $v_m = 3$ )   | -2.914    | -2.564    | -3.946    | -5.081    | -2.162     | -2.230    | -2.944    |
| Zr ( $v_m = 4$ )  | -3.658    | -4.250    | -5.927    | -8.136    | -2.936     | -3.387    | -5.109    |
| Nb ( $v_m = 5$ )  | -3.496    | -5.204    | -7.869    | -8.732    | -3.396     | -4.402    | -5.546    |
| Mo ( $v_m = 6$ )  | -3.054    | -6.359    | -8.727    | -8.661    | -3.961     | -5.138    | -5.496    |
| Tc ( $v_m = 7$ )  | -3.195    | -6.983    | -8.805    | -7.610    | -4.564     | -5.214    | -4.812    |
| Ru ( $v_m = 8$ )  | -3.280    | -7.126    | -6.867    | -5.462    | -4.900     | -4.179    | -3.557    |
| Rh ( $v_m = 9$ )  | -2.930    | -4.251    | -4.069    | -3.427    | -3.133     | -2.502    | -2.071    |
| Pd ( $v_m = 10$ ) | -0.830    | -1.446    | -1.876    | -1.375    | -1.179     | -0.494    | -0.364    |
| Hf ( $v_m = 4$ )  | -3.851    | -4.344    | -5.859    | -8.148    | -2.554     | -3.549    | -5.237    |
| Ta ( $v_m = 5$ )  | -3.786    | -5.253    | -7.837    | -8.911    | -3.582     | -4.625    | -5.893    |
| W ( $v_m = 6$ )   | -3.705    | -6.547    | -8.921    | -9.083    | -4.324     | -5.513    | -6.042    |
| Re ( $v_m = 7$ )  | -3.523    | -7.287    | -9.089    | -8.308    | -5.040     | -5.732    | -5.529    |
| Os ( $v_m = 8$ )  | -3.310    | -7.359    | -7.605    | -5.963    | -5.168     | -4.718    | -3.913    |
| Ir ( $v_m = 9$ )  | -3.008    | -5.022    | -4.320    | -3.667    | -3.544     | -2.691    | -2.275    |
| Pt ( $v_m = 10$ ) | -1.089    | -2.136    | -1.902    | -1.636    | -1.410     | -0.671    | -0.590    |

**Table S2** Adsorption energies of atomic intermediates (H, C, N, O, Si, P, and S) on transition-metal dopants in WS<sub>2</sub>.

| Dopant            | H (k = 1) | C (k = 2) | N (k = 3) | O (k = 4) | Si (k = 2) | P (k = 3) | S (k = 4) |
|-------------------|-----------|-----------|-----------|-----------|------------|-----------|-----------|
| Sc ( $v_m = 3$ )  | -3.081    | -3.820    | -5.774    | -7.772    | -2.458     | -2.982    | -5.457    |
| Ti ( $v_m = 4$ )  | -3.143    | -4.319    | -7.064    | -8.044    | -2.690     | -3.993    | -5.621    |
| V ( $v_m = 5$ )   | -2.731    | -4.838    | -7.178    | -7.609    | -2.579     | -3.594    | -5.337    |
| Cr ( $v_m = 6$ )  | -2.803    | -5.121    | -6.777    | -6.532    | -2.796     | -3.428    | -4.480    |
| Mn ( $v_m = 7$ )  | -2.975    | -5.820    | -7.053    | -5.984    | -3.410     | -3.666    | -4.551    |
| Fe ( $v_m = 8$ )  | -2.676    | -5.948    | -6.276    | -5.451    | -3.786     | -3.603    | -4.274    |
| Co ( $v_m = 9$ )  | -2.362    | -5.237    | -5.261    | -5.105    | -3.708     | -3.299    | -3.962    |
| Ni ( $v_m = 10$ ) | -2.076    | -3.516    | -3.832    | -3.945    | -2.780     | -2.125    | -3.244    |
| Y ( $v_m = 3$ )   | -3.047    | -3.707    | -5.606    | -7.614    | -2.418     | -2.895    | -5.409    |
| Zr ( $v_m = 4$ )  | -3.338    | -4.689    | -7.254    | -8.302    | -2.856     | -3.698    | -5.925    |
| Nb ( $v_m = 5$ )  | -3.289    | -5.431    | -7.999    | -8.472    | -3.388     | -4.352    | -6.080    |
| Mo ( $v_m = 6$ )  | -2.970    | -6.410    | -8.275    | -8.405    | -3.905     | -4.748    | -6.081    |
| Tc ( $v_m = 7$ )  | -2.929    | -6.808    | -8.372    | -7.491    | -4.209     | -4.841    | -5.541    |
| Ru ( $v_m = 8$ )  | -2.624    | -6.969    | -7.171    | -5.876    | -4.635     | -4.316    | -4.696    |
| Rh ( $v_m = 9$ )  | -2.523    | -5.734    | -5.220    | -4.574    | -4.081     | -3.403    | -3.717    |
| Pd ( $v_m = 10$ ) | -1.923    | -3.325    | -3.456    | -3.031    | -2.808     | -1.909    | -2.750    |
| Hf ( $v_m = 4$ )  | -3.408    | -4.377    | -6.683    | -8.106    | -2.719     | -3.642    | -5.925    |
| Ta ( $v_m = 5$ )  | -3.606    | -5.402    | -7.770    | -8.843    | -3.494     | -4.548    | -6.635    |
| W ( $v_m = 6$ )   | -3.599    | -6.536    | -8.543    | -8.981    | -4.182     | -5.273    | -6.812    |
| Re ( $v_m = 7$ )  | -3.512    | -6.951    | -8.682    | -8.358    | -4.574     | -5.485    | -6.517    |
| Os ( $v_m = 8$ )  | -3.239    | -7.260    | -8.069    | -7.230    | -5.073     | -5.261    | -5.907    |
| Ir ( $v_m = 9$ )  | -3.038    | -6.660    | -6.911    | -5.624    | -4.942     | -4.806    | -4.854    |
| Pt ( $v_m = 10$ ) | -2.781    | -5.430    | -4.817    | -4.250    | -4.428     | -3.411    | -3.893    |

**Table S3** Adsorption energies of molecular intermediates (CO, NO, H<sub>2</sub>O, NH<sub>3</sub>, N<sub>2</sub>, and NNH) on 4d transition-metal dopants in N-doped graphene.

| Dopant                   | CO      | NO      | H <sub>2</sub> O | NH <sub>3</sub> | N <sub>2</sub> | NNH<br>(linear) | NNH<br>(bent) |
|--------------------------|---------|---------|------------------|-----------------|----------------|-----------------|---------------|
|                          | (k = 2) | (k = 3) | (k = 2)          | (k = 2)         | (k = 2)        | (k = 3)         | (k = 1)       |
| Y (v <sub>m</sub> = 3)   | -0.971  | -2.278  | -0.924           | -1.058          | -0.745         | -1.977          | –             |
| Zr (v <sub>m</sub> = 4)  | -1.451  | -3.085  | -1.026           | -1.205          | -1.107         | -2.898          | –             |
| Nb (v <sub>m</sub> = 5)  | -1.886  | -3.631  | -0.677           | -1.035          | -1.185         | -3.307          | –             |
| Mo (v <sub>m</sub> = 6)  | -2.167  | -4.062  | -0.739           | -1.180          | -1.308         | -3.550          | –             |
| Tc (v <sub>m</sub> = 7)  | -2.507  | -4.149  | -0.523           | -1.081          | -1.177         | -3.546          | –             |
| Ru (v <sub>m</sub> = 8)  | -2.742  | -3.020  | -0.335           | -1.105          | -1.352         | –               | -2.393        |
| Rh (v <sub>m</sub> = 9)  | -0.830  | -0.566  | -0.319           | -0.271          | 0.099          | –               | -1.661        |
| Pd (v <sub>m</sub> = 10) | -0.077  | -0.100  | -0.221           | -0.139          | -0.074         | –               | -0.222        |

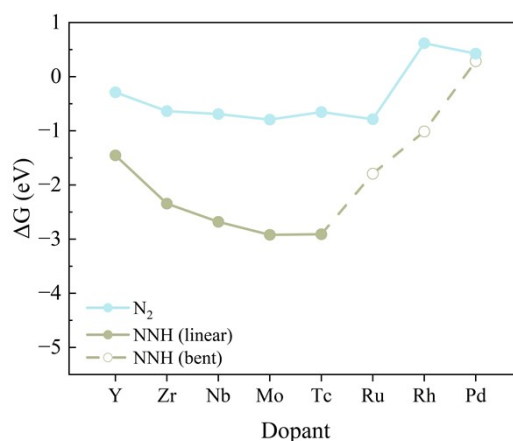

**Fig. S1** Calculated Gibbs free energy ( $\Delta G$ ) of N<sub>2</sub> and NNH adsorption on the 4d dopant sites of N-doped graphene

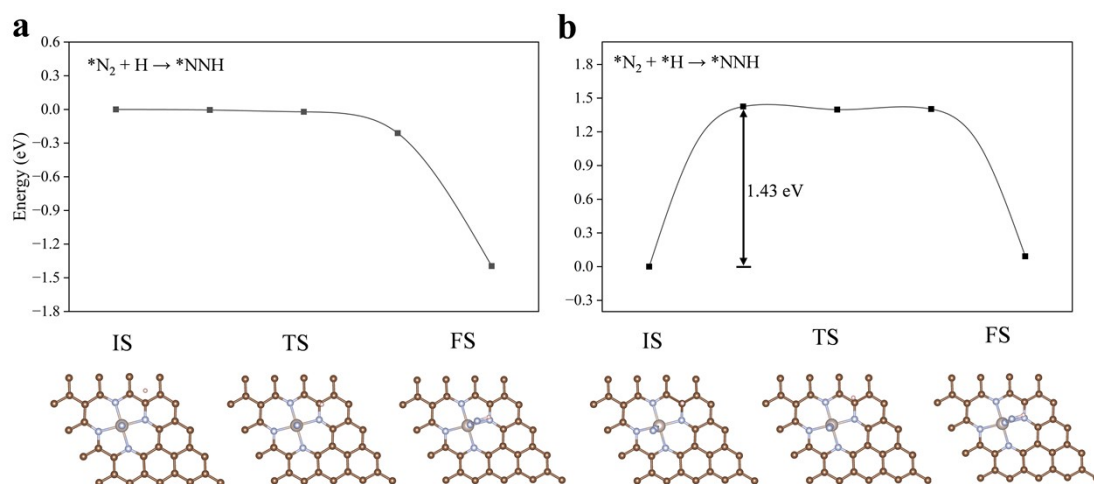

**Fig. S2** Initial (IS), transition (TS), and final state (FS) configurations and the corresponding energy profiles for NNH formation. (a) Vacuum-assisted pathway, where  $N_2$  reacts with a hydrogen species in the vacuum region; (b) Surface-mediated pathway involving an adsorbed hydrogen atom ( $*H$ ) at the interfacial C-top site.

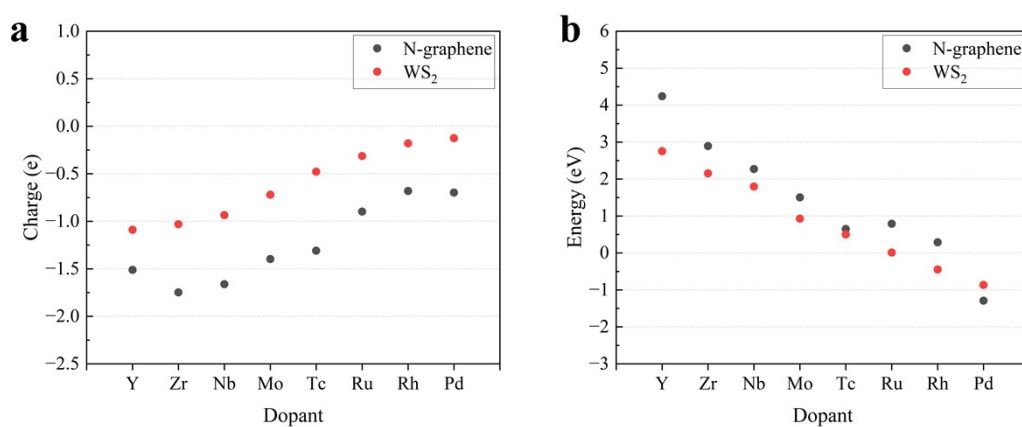

**Fig. S3** (a) Comparison of Bader charges of 4d dopant metals on pristine N-doped graphene and  $WS_2$ , where negative and positive values indicate electron loss and gain, respectively; (b) d-band center positions of the 4d dopant metals on  $WS_2$  and N-doped graphene.

To ensure the numerical reliability of our calculations, we performed systematic convergence tests using N adsorption on 4d transition metals anchored on N-doped graphene as a representative model system. We compared our standard parameters (400 eV cutoff,  $3\times 3\times 1$  k-point mesh) with more stringent settings (550 eV cutoff,  $13\times 13\times 1$  k-point mesh). As shown in Fig. S4, the calculated adsorption energies exhibit a maximum deviation of only 0.055 eV across the entire 4d series, and more importantly, the qualitative trend—essential to the 10-electron rule—remains perfectly consistent. Furthermore, a comparison of the projected density of states (PDOS) for the d-orbitals of Tc shows that the electronic structures are virtually identical under both parameter sets. These results confirm that a 400 eV cutoff and the chosen k-point sampling provide a well-balanced compromise between computational efficiency and the required accuracy for describing both the energetic and electronic properties of these SAC systems.

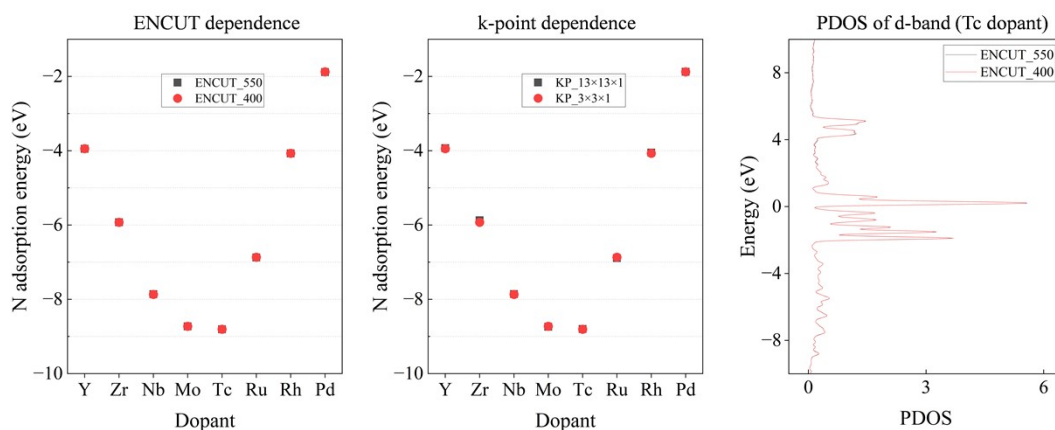

**Fig. S4** Convergence tests for plane-wave cutoff energy and k-point sampling. Comparison of adsorption energies of N adatoms on N-doped graphene calculated with cutoff energies of 400 eV and 550 eV, and k-point meshes of  $3\times 3\times 1$  and  $13\times 13\times 1$ . Also shown is the projected density of states (PDOS) of the d-band for the Tc dopant at different cutoff energies.

To verify that our conclusions are not sensitive to the choice of exchange–correlation

functional, we performed DFT+U calculations for N adsorption across the 4d series on N-doped graphene. The effective Hubbard parameters ( $U_{\text{eff}} = U - J$ ) were adopted from the literature<sup>1-4</sup>, with values for Y and Zr obtained by linear extrapolation:

$$U - J = 0.2131 \times n + 1.424$$

Where  $n = 1$  for Y;  $n = 2$  for Zr.

As shown in Fig. S5, the inclusion of U preserves the characteristic V-shaped adsorption energy trend across the series. Although a slight shift in the energetic minimum (from Tc to Mo) is observed, the overall trend remains unchanged. These results confirm that the 10-electron rule provides a robust qualitative framework, even when electron correlation effects are included.

**Table S4** U-J parameters for DFT+U calculations<sup>1</sup>.

| Dopant | U / eV | J / eV | U-J / eV |
|--------|--------|--------|----------|
| Y      | –      | –      | 1.63     |
| Zr     | –      | –      | 1.85     |
| Nb     | 2.59   | 0.52   | 2.07     |
| Mo     | 2.83   | 0.52   | 2.31     |
| Tc     | 3.08   | 0.54   | 2.54     |
| Ru     | 3.40   | 0.54   | 2.86     |
| Rh     | 3.63   | 0.56   | 3.07     |
| Pd     | 3.95   | 0.61   | 3.34     |

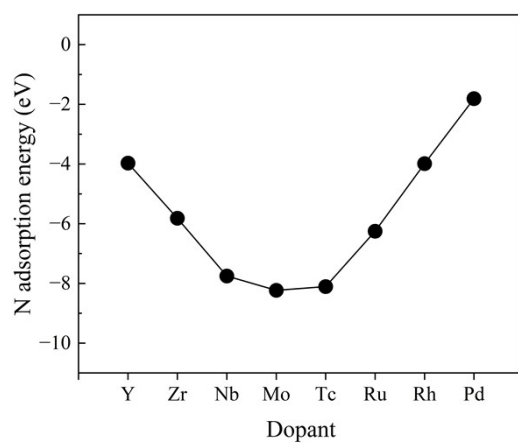

**Fig. S5** N adsorption energies of 4d transition-metal dopants on N-doped graphene: DFT+U results.

## References

- 1 I. V. Solovyev, P. H. Dederichs and V. I. Anisimov, *Phys. Rev. B*, 1994, **50**, 16861-16871.
- 2 G. Di Liberto, L. A. Cipriano and G. Pacchioni, *ACS Catal.*, 2022, **12**, 5846-5856.
- 3 H. Xu, D. Cheng, D. Cao and X. C. Zeng, *Nat. Catal.*, 2018, **1**, 339-348.
- 4 L. A. Cipriano, G. Di Liberto and G. Pacchioni, *ACS Catal.*, 2022, **12**, 11682-11691.
